# Supplementary material for: Abnormal dopaminergic modulation of striato-cortical networks underlies levodopa-induced dyskinesias in humans
Source: PubMed Central journal article supplement (PMC4614130; doi:10.1093/brain/awv096), 2015-04-15
Supplement: eea0c7aaae49e4cdfb604e880c36f09e_brain-2014-02163-File005.pdf [file eea0c7aaae49e4cdfb604e880c36f09e_brain-2014-02163-File005.pdf]

| Variable             | LID           | No-LID        | <i>P</i> value<br>(uncorrected) |
|----------------------|---------------|---------------|---------------------------------|
| Gender               | 7f/6m         | 4f/9m         | 0.428                           |
| Handedness           | 11r           | 12r           | 1                               |
| Age (y)              | 68.9 ± 10.4   | 67.5 ± 6.5    | 0.705                           |
| Education (y)        | 14.9 ± 3.6    | 13.7 ± 3.4    | 0.406                           |
| MMSE                 | 29.2 ± 1      | 29.6 ± 0.9    | 0.309                           |
| MoCA                 | 28.3 ± 1.4    | 28.6 ± 1      | 0.538                           |
| BIS                  | 57.4 ± 7.5    | 55.5 ± 7.6    | 0.522                           |
| Disease Duration (y) | 7.5 ± 4.2     | 6.1 ± 3.3     | 0.336                           |
| LEDD (all medicine)  | 974.2 ± 415.9 | 672.3 ± 256.7 | 0.036*                          |
| LEDD (levodopa)      | 823 ± 396     | 454 ± 227     | 0.009*                          |
| LEDD (agonists)      | 162 ± 115     | 218 ± 135     | 0.267                           |
| Medicine (Agonists)  | 10            | 12            | 0.593                           |
| UPDRS-III-OFF        | 32.5 ± 10.5   | 32.9 ± 6.8    | 0.912                           |
| UPDRS-III-ON         | 20 ± 7.5      | 21.2 ± 5.1    | 0.630                           |
| Δ UPDRS-III          | 12.5 ± 4.9    | 11.6 ± 4      | 0.634                           |
| UDysRS (obj.)        | 15.46 ± 8.7   | -             | -                               |

**Supplementary table 1. Clinical and demographic characteristics of the LID and No-LID group.**

Gender and handedness were compared using chi-square tests. Chi-square test was also used to compare whether dopamine agonists were more frequently added to levodopa therapy in LID (n = 10/13) compared to No-LID patients (n = 12/13). Age, education, MMSE, MoCA, BIS, disease duration, LEDD (all dopaminergic medication, levodopa, agonists), UPDRS-OFF, -ON, and -ON vs. OFF

were compared using independent samples t-tests. r, right; y, years. UPDRS-ON was assessed ~ 45 min after intake of 200 mg fast-acting soluble levodopa (i.e. after the MRI session). \* indicates significant differences between groups.

|      | preSMA |    |    | right M1 |     |    | left M1 |     |    | right putamen |    |   | left putamen |    |    |
|------|--------|----|----|----------|-----|----|---------|-----|----|---------------|----|---|--------------|----|----|
|      | x      | y  | z  | x        | y   | z  | x       | y   | z  | x             | y  | z | x            | y  | z  |
| fMRI | -4     | 8  | 58 | 40       | -24 | 56 | -38     | -28 | 52 | 34            | 0  | 4 | -28          | 10 | -8 |
| DCM  |        |    |    |          |     |    |         |     |    |               |    |   |              |    |    |
| mean | -5     | 12 | 54 | 46       | -22 | 58 | -44     | -27 | 57 | 25            | -1 | 3 | -23          | 6  | -4 |
| sd   | 8      | 4  | 8  | 6        | 8   | 4  | 6       | 6   | 9  | 4             | 4  | 7 | 4            | 11 | 6  |

**Supplementary table 2. Mean coordinates for the DCM analysis.**

“fMRI” shows the group maxima of the respective fMRI contrasts for the regions considered in the DCM (Left: right M1; Right: left M1, NoGo: preSMA, right and left putamen). For each individual participant coordinates were moved to the individual maxima in the respective anatomical region. The mean and standard deviation (sd) of the resulting coordinates are shown.

| B-matrix |             | LID (model 9) | No-LID (model 7) |
|----------|-------------|---------------|------------------|
|          | preSMA-rPut | -0.07         | -0.04            |
|          | preSMA-lPut | -0.20         | +0.07            |
|          | rPut-preSMA | +0.06         | +0.11            |
|          | lPut-preSMA | +0.02         | +0.09            |
|          | rM1-rPut    | -0.19         | -                |
|          | lM1-lPut    | -0.04         | -                |
|          | rPut-rM1    | -0.31         | -                |
|          | lPut-lM1    | +0.17         | -                |
| C-matrix |             |               |                  |
| Left     | rM1         | +0.28         | +0.37            |
| Right    | lM1         | +0.27         | +0.36            |
| NoGo     | preSMA      | -0.03         | -0.01            |
|          | rPut        | +0.03         | -0.02            |
|          | lPut        | +0.0004       | -0.07            |
| A-matrix |             |               |                  |
|          | rPut-preSMA | -0.04         | +0.002           |
|          | lPut-preSMA | +0.10         | +0.02            |
|          | lM1-rM1     | +0.20         | -0.01            |
|          | rPut-rM1    | +0.16         | +0.08            |
|          | lPut-rM1    | -0.01         | -0.001           |
|          | rM1-lM1     | +0.03         | +0.05            |
|          | rPut-lM1    | -0.06         | -0.01            |
|          | lPut-lM1    | -0.03         | +0.04            |
|          | preSMA-rPut | +0.26         | +0.18            |
|          | rM1-rPut    | -0.03         | -0.19            |
|          | lM1-rPut    | -0.62         | -0.06            |
|          | lPut-rPut   | +0.21         | +0.09            |
|          | preSMA-lPut | +0.06         | -0.16            |
|          | rM1-lPut    | -0.52         | +0.04            |
|          | lM1-lPut    | +0.28         | +0.64            |
|          | rPut-lPut   | +0.15         | +0.06            |

**Supplementary table 3: Estimated DCM parameters**

The table shows the parameters (B-, C- and A-matrix) for all considered regions and connections separately for the respective best model of the LID group (model 9) and No-LID group (model 7).
